# Supplementary material
Source: publisher site journal article supplement (https://static.cambridge.org/content/id/urn:cambridge.org:id:article:S0266466620000146/resource/name/S0266466620000146supp001.aux)
Supplement: Supplementary file 1 [file S0266466620000146supp001.aux]

\relax 
\providecommand\hyper@newdestlabel[2]{}
\providecommand\HyperFirstAtBeginDocument{\AtBeginDocument}
\HyperFirstAtBeginDocument{\ifx\hyper@anchor\@undefined
\global\let\oldcontentsline\contentsline
\gdef\contentsline#1#2#3#4{\oldcontentsline{#1}{#2}{#3}}
\global\let\oldnewlabel\newlabel
\gdef\newlabel#1#2{\newlabelxx{#1}#2}
\gdef\newlabelxx#1#2#3#4#5#6{\oldnewlabel{#1}{{#2}{#3}}}
\AtEndDocument{\ifx\hyper@anchor\@undefined
\let\contentsline\oldcontentsline
\let\newlabel\oldnewlabel
\fi}
\fi}
\global\let\hyper@last\relax 
\gdef\HyperFirstAtBeginDocument#1{#1}
\providecommand\HyField@AuxAddToFields[1]{}
\providecommand\HyField@AuxAddToCoFields[2]{}
\@writefile{toc}{\contentsline {section}{\numberline {1}Propositions and Lemmas}{1}{section.1}\protected@file@percent }
\newlabel{lemmas}{{1}{1}{Propositions and Lemmas}{section.1}{}}
\newlabel{lemmas@cref}{{[section][1][]1}{[1][1][]1}}
\newlabel{proposition1}{{1}{1}{}{proposition.1}{}}
\newlabel{proposition1@cref}{{[proposition][1][]1}{[1][1][]1}}
\newlabel{B_nk}{{A.1}{1}{}{equation.1.1}{}}
\newlabel{B_nk@cref}{{[equation][1][]A.1}{[1][1][]1}}
\newlabel{proposition2}{{2}{1}{}{proposition.2}{}}
\newlabel{proposition2@cref}{{[proposition][2][]2}{[1][1][]1}}
\newlabel{prop}{{3}{1}{}{proposition.3}{}}
\newlabel{prop@cref}{{[proposition][3][]3}{[1][1][]1}}
\newlabel{thetahat}{{A.2}{1}{}{equation.1.2}{}}
\newlabel{thetahat@cref}{{[equation][2][]A.2}{[1][1][]1}}
\newlabel{lemma1}{{1}{1}{}{lemma.1}{}}
\newlabel{lemma1@cref}{{[lemma][1][]1}{[1][1][]1}}
\citation{racine2004nonparametric}
\newlabel{lemma2}{{2}{2}{}{lemma.2}{}}
\newlabel{lemma2@cref}{{[lemma][2][]2}{[1][1][]2}}
\newlabel{lemma3}{{3}{2}{}{lemma.3}{}}
\newlabel{lemma3@cref}{{[lemma][3][]3}{[1][2][]2}}
\newlabel{lemma4}{{4}{2}{}{lemma.4}{}}
\newlabel{lemma4@cref}{{[lemma][4][]4}{[1][2][]2}}
\newlabel{lemma5}{{5}{2}{}{lemma.5}{}}
\newlabel{lemma5@cref}{{[lemma][5][]5}{[1][2][]2}}
\newlabel{lemma6}{{6}{2}{}{lemma.6}{}}
\newlabel{lemma6@cref}{{[lemma][6][]6}{[1][2][]2}}
\newlabel{lemma7}{{7}{2}{}{lemma.7}{}}
\newlabel{lemma7@cref}{{[lemma][7][]7}{[1][2][]2}}
\newlabel{lemma8}{{8}{2}{}{lemma.8}{}}
\newlabel{lemma8@cref}{{[lemma][8][]8}{[1][2][]2}}
\citation{knight1998limiting,kai2010local}
\citation{knight1998limiting}
\@writefile{toc}{\contentsline {section}{\numberline {2}Proofs}{3}{section.2}\protected@file@percent }
\newlabel{pp1}{{2}{3}{Proofs}{section.2}{}}
\newlabel{pp1@cref}{{[section][2][]2}{[1][3][]3}}
\newlabel{pp2}{{2}{3}{Proofs}{section.2}{}}
\newlabel{pp2@cref}{{[section][2][]2}{[1][3][]3}}
\newlabel{expectation B}{{A.3}{3}{Proofs}{equation.2.3}{}}
\newlabel{expectation B@cref}{{[equation][3][]A.3}{[1][3][]3}}
\citation{pollard1991asymptotics}
\newlabel{pt1}{{2}{4}{Proofs}{equation.2.3}{}}
\newlabel{pt1@cref}{{[section][2][]2}{[1][4][]4}}
\newlabel{S_n limit}{{A.4}{4}{Proofs}{equation.2.4}{}}
\newlabel{S_n limit@cref}{{[equation][4][]A.4}{[1][4][]4}}
\newlabel{L_n}{{A.5}{4}{Proofs}{equation.2.5}{}}
\newlabel{L_n@cref}{{[equation][5][]A.5}{[1][4][]4}}
\newlabel{theta hat}{{A.6}{4}{Proofs}{equation.2.6}{}}
\newlabel{theta hat@cref}{{[equation][6][]A.6}{[1][4][]4}}
\newlabel{pt2}{{2}{5}{Proofs}{equation.2.6}{}}
\newlabel{pt2@cref}{{[section][2][]2}{[1][5][]5}}
\newlabel{pt3}{{2}{7}{Proofs}{equation.2.6}{}}
\newlabel{pt3@cref}{{[section][2][]2}{[1][7][]7}}
\newlabel{h0}{{A.7}{7}{Proofs}{equation.2.7}{}}
\newlabel{h0@cref}{{[equation][7][]A.7}{[1][7][]7}}
\citation{hall2004cross,ichimura2000asymptotic}
\citation{li2004cross,racine2004nonparametric}
\citation{li2004cross,racine2004nonparametric}
\newlabel{cv eq}{{A.8}{8}{Proofs}{equation.2.8}{}}
\newlabel{cv eq@cref}{{[equation][8][]A.8}{[1][7][]8}}
\newlabel{lambda hat}{{A.9}{8}{Proofs}{equation.2.9}{}}
\newlabel{lambda hat@cref}{{[equation][9][]A.9}{[1][8][]8}}
\newlabel{h foc}{{A.10}{8}{Proofs}{equation.2.10}{}}
\newlabel{h foc@cref}{{[equation][10][]A.10}{[1][8][]8}}
\newlabel{h1}{{A.11}{8}{Proofs}{equation.2.11}{}}
\newlabel{h1@cref}{{[equation][11][]A.11}{[1][8][]8}}
\newlabel{h hat rate}{{A.12}{8}{Proofs}{equation.2.12}{}}
\newlabel{h hat rate@cref}{{[equation][12][]A.12}{[1][8][]8}}
\newlabel{lambda hat 2}{{A.13}{8}{Proofs}{equation.2.13}{}}
\newlabel{lambda hat 2@cref}{{[equation][13][]A.13}{[1][8][]8}}
\newlabel{lambda hat rate}{{A.14}{8}{Proofs}{equation.2.14}{}}
\newlabel{lambda hat rate@cref}{{[equation][14][]A.14}{[1][8][]8}}
\newlabel{zerohl}{{A.15}{9}{Proofs}{equation.2.15}{}}
\newlabel{zerohl@cref}{{[equation][15][]A.15}{[1][9][]9}}
\newlabel{result1}{{2}{15}{Proofs}{equation.2.17}{}}
\newlabel{result1@cref}{{[section][2][]2}{[1][15][]15}}
\newlabel{eq1 for result2}{{A.18}{16}{Proofs}{equation.2.18}{}}
\newlabel{eq1 for result2@cref}{{[equation][18][]A.18}{[1][16][]16}}
\newlabel{result2}{{A.19}{16}{Proofs}{equation.2.19}{}}
\newlabel{result2@cref}{{[equation][19][]A.19}{[1][16][]16}}
\newlabel{expectation of lam prod}{{A.20}{16}{Proofs}{equation.2.20}{}}
\newlabel{expectation of lam prod@cref}{{[equation][20][]A.20}{[1][16][]16}}
\newlabel{lemma4eqn}{{A.21}{17}{Proofs}{equation.2.21}{}}
\newlabel{lemma4eqn@cref}{{[equation][21][]A.21}{[1][16][]17}}
\newlabel{expectation in s1a}{{A.22}{18}{Proofs}{equation.2.22}{}}
\newlabel{expectation in s1a@cref}{{[equation][22][]A.22}{[1][18][]18}}
\newlabel{KLeta}{{A.23}{18}{Proofs}{equation.2.23}{}}
\newlabel{KLeta@cref}{{[equation][23][]A.23}{[1][18][]18}}
\newlabel{with source 1}{{A.24}{22}{Proofs}{equation.2.24}{}}
\newlabel{with source 1@cref}{{[equation][24][]A.24}{[1][21][]22}}
\newlabel{with source 2}{{A.25}{22}{Proofs}{equation.2.25}{}}
\newlabel{with source 2@cref}{{[equation][25][]A.25}{[1][22][]22}}
\newlabel{L_n_leadning}{{A.26}{23}{Proofs}{equation.2.26}{}}
\newlabel{L_n_leadning@cref}{{[equation][26][]A.26}{[1][23][]23}}
\newlabel{theat hat D}{{A.27}{23}{Proofs}{equation.2.27}{}}
\newlabel{theat hat D@cref}{{[equation][27][]A.27}{[1][23][]23}}
\newlabel{theat hat with leading}{{A.28}{23}{Proofs}{equation.2.28}{}}
\newlabel{theat hat with leading@cref}{{[equation][28][]A.28}{[1][23][]23}}
\newlabel{u hat with leading}{{A.29}{24}{Proofs}{equation.2.29}{}}
\newlabel{u hat with leading@cref}{{[equation][29][]A.29}{[1][24][]24}}
\newlabel{g hat updated}{{A.30}{24}{Proofs}{equation.2.30}{}}
\newlabel{g hat updated@cref}{{[equation][30][]A.30}{[1][24][]24}}
\newlabel{g hat -i updated}{{A.31}{24}{Proofs}{equation.2.31}{}}
\newlabel{g hat -i updated@cref}{{[equation][31][]A.31}{[1][24][]24}}
\newlabel{cv1 updated}{{A.34}{24}{Proofs}{equation.2.34}{}}
\newlabel{cv1 updated@cref}{{[equation][34][]A.34}{[1][24][]24}}
\newlabel{G3}{{A.36}{25}{Proofs}{equation.2.36}{}}
\newlabel{G3@cref}{{[equation][36][]A.36}{[1][25][]25}}
\@writefile{toc}{\contentsline {section}{\numberline {3}Figures for other distributions}{25}{section.3}\protected@file@percent }
\bibstyle{et}
\bibdata{mixed}
\bibcite{hall2004cross}{{1}{2004}{{Hall, Racine, and Li}}{{Hall, Racine, and Li}}}
\bibcite{ichimura2000asymptotic}{{2}{2000}{{Ichimura}}{{Ichimura}}}
\bibcite{kai2010local}{{3}{2010}{{Kai, Li, and Zou}}{{Kai, Li, and Zou}}}
\bibcite{knight1998limiting}{{4}{1998}{{Knight}}{{Knight}}}
\bibcite{koenker2004quantile}{{5}{2004}{{Koenker}}{{Koenker}}}
\bibcite{li2004cross}{{6}{2004}{{Li and Racine}}{{Li and Racine}}}
\bibcite{pollard1991asymptotics}{{7}{1991}{{Pollard}}{{Pollard}}}
\bibcite{racine2004nonparametric}{{8}{2004}{{Racine and Li}}{{Racine and Li}}}
\@writefile{lof}{\contentsline {figure}{\numberline {1}{\ignorespaces DGP 2 Laplace distribution coverage results. Shaded interval: asymptotic 95\% confidence interval, averaged over $1000$ replications; solid line: $g(x)$. $X^d=0$ in the left panel and $X^d=1$ in the right panel.\relax }}{26}{figure.caption.1}\protected@file@percent }
\providecommand*\caption@xref[2]{\@setref\relax\@undefined{#1}}
\newlabel{fig:DGP2_Laplace_coverage}{{1}{26}{DGP 2 Laplace distribution coverage results. Shaded interval: asymptotic 95\% confidence interval, averaged over $1000$ replications; solid line: $g(x)$. $X^d=0$ in the left panel and $X^d=1$ in the right panel.\relax }{figure.caption.1}{}}
\newlabel{fig:DGP2_Laplace_coverage@cref}{{[figure][1][]1}{[1][25][]26}}
\@writefile{lof}{\contentsline {figure}{\numberline {2}{\ignorespaces DGP 2 $0.95\mathcal  N(0,1)+0.05\mathcal  N(0,9)$ distribution coverage results. Shaded interval: asymptotic 95\% confidence interval, averaged over $1000$ replications; solid line: $g(x)$. $X^d=0$ in the left panel and $X^d=1$ in the right panel.\relax }}{26}{figure.caption.2}\protected@file@percent }
\newlabel{fig:DGP2_mixture3_coverage}{{2}{26}{DGP 2 $0.95\mathcal N(0,1)+0.05\mathcal N(0,9)$ distribution coverage results. Shaded interval: asymptotic 95\% confidence interval, averaged over $1000$ replications; solid line: $g(x)$. $X^d=0$ in the left panel and $X^d=1$ in the right panel.\relax }{figure.caption.2}{}}
\newlabel{fig:DGP2_mixture3_coverage@cref}{{[figure][2][]2}{[1][25][]26}}
\@writefile{lof}{\contentsline {figure}{\numberline {3}{\ignorespaces DGP 2 $0.95\mathcal  N(0,1)+0.05\mathcal  N(0,100)$ distribution coverage results. Shaded interval: asymptotic 95\% confidence interval, averaged over $1000$ replications; solid line: $g(x)$. $X^d=0$ in the left panel and $X^d=1$ in the right panel.\relax }}{26}{figure.caption.3}\protected@file@percent }
\newlabel{fig:DGP2_mixture10_coverage}{{3}{26}{DGP 2 $0.95\mathcal N(0,1)+0.05\mathcal N(0,100)$ distribution coverage results. Shaded interval: asymptotic 95\% confidence interval, averaged over $1000$ replications; solid line: $g(x)$. $X^d=0$ in the left panel and $X^d=1$ in the right panel.\relax }{figure.caption.3}{}}
\newlabel{fig:DGP2_mixture10_coverage@cref}{{[figure][3][]3}{[1][25][]26}}
\@writefile{lof}{\contentsline {figure}{\numberline {4}{\ignorespaces DGP 2 Laplace distribution results. Dashed lines: bootstrap 95\% confidence interval; shaded interval: asymptotic 95\% confidence interval; solid line: $g(x)$. $X^d=0$ in the left panel and $X^d=1$ in the right panel.\relax }}{27}{figure.caption.4}\protected@file@percent }
\newlabel{fig:Laplace_DGP2}{{4}{27}{DGP 2 Laplace distribution results. Dashed lines: bootstrap 95\% confidence interval; shaded interval: asymptotic 95\% confidence interval; solid line: $g(x)$. $X^d=0$ in the left panel and $X^d=1$ in the right panel.\relax }{figure.caption.4}{}}
\newlabel{fig:Laplace_DGP2@cref}{{[figure][4][]4}{[1][25][]27}}
\@writefile{lof}{\contentsline {figure}{\numberline {5}{\ignorespaces DGP 2 $0.95\mathcal  N(0,1)+0.05\mathcal  N(0,9)$ distribution results. Dashed lines: bootstrap 95\% confidence interval; shaded interval: asymptotic 95\% confidence interval; solid line: $g(x)$. $X^d=0$ in the left panel and $X^d=1$ in the right panel.\relax }}{27}{figure.caption.5}\protected@file@percent }
\newlabel{fig:mixture3_DGP2}{{5}{27}{DGP 2 $0.95\mathcal N(0,1)+0.05\mathcal N(0,9)$ distribution results. Dashed lines: bootstrap 95\% confidence interval; shaded interval: asymptotic 95\% confidence interval; solid line: $g(x)$. $X^d=0$ in the left panel and $X^d=1$ in the right panel.\relax }{figure.caption.5}{}}
\newlabel{fig:mixture3_DGP2@cref}{{[figure][5][]5}{[1][25][]27}}
\@writefile{lof}{\contentsline {figure}{\numberline {6}{\ignorespaces DGP 2 $0.95\mathcal  N(0,1)+0.05\mathcal  N(0,100)$ distribution results. Dashed lines: bootstrap 95\% confidence interval; shaded interval: asymptotic 95\% confidence interval; solid line: $g(x)$. $X^d=0$ in the left panel and $X^d=1$ in the right panel.\relax }}{27}{figure.caption.6}\protected@file@percent }
\newlabel{fig:mixture10_DGP2}{{6}{27}{DGP 2 $0.95\mathcal N(0,1)+0.05\mathcal N(0,100)$ distribution results. Dashed lines: bootstrap 95\% confidence interval; shaded interval: asymptotic 95\% confidence interval; solid line: $g(x)$. $X^d=0$ in the left panel and $X^d=1$ in the right panel.\relax }{figure.caption.6}{}}
\newlabel{fig:mixture10_DGP2@cref}{{[figure][6][]6}{[1][25][]27}}
